# Supplementary material for: Theoretical characterization of 5-oxo, 7-oxo and 5-oxo-7-amino[1,2,4]triazolo[1,5-a]pyrimidines †
Source: Royal Society of Chemistry journal article supplement (doi:10.1039/b002527p), 2000-01-01
Supplement: b002527p4.pdf [file b002527p4.pdf]

## Supplementary Material

Table S1: The electron charge density,  $\rho(r)$ , its  $\nabla^2\rho(r)$ , ellipticity,  $\epsilon$  of structures **2a,b**, **4a,b** and **6a,c** for the different BCPs at the B3LYP/6-311+G\*\* level

|                                 | $\rho(r)$<br>( $e/a_o^3$ ) | $\nabla^2\rho(r)$<br>( $e/a_o^5$ ) | $\epsilon$ | $\rho(r)$<br>( $e/a_o^3$ ) | $\nabla^2\rho(r)$<br>( $e/a_o^5$ ) | $\epsilon$ |
|---------------------------------|----------------------------|------------------------------------|------------|----------------------------|------------------------------------|------------|
|                                 | <b>2a</b>                  |                                    |            | <b>2b</b>                  |                                    |            |
| N <sub>1</sub> -C <sub>2</sub>  | -0.808                     | 0.091                              | -0.412     | -0.994                     | 0.321                              | -0.575     |
| C <sub>2</sub> -N <sub>3</sub>  | -1.117                     | 0.230                              | -0.582     | -0.788                     | 0.140                              | -0.421     |
| N <sub>3</sub> -C <sub>3a</sub> | -0.913                     | 0.102                              | -0.367     | -0.873                     | 0.179                              | -0.408     |
| C <sub>3a</sub> -N <sub>4</sub> | -1.187                     | 0.225                              | -0.565     | -1.204                     | 0.215                              | -0.549     |
| N <sub>4</sub> -C <sub>5</sub>  | -0.857                     | 0.055                              | -0.358     | -0.839                     | 0.063                              | -0.355     |
| C <sub>5</sub> -C <sub>6</sub>  | -0.661                     | 0.121                              | -0.234     | -0.658                     | 0.124                              | -0.233     |
| C <sub>6</sub> -C <sub>7</sub>  | -0.976                     | 0.327                              | -0.379     | -0.976                     | 0.327                              | -0.378     |
| C <sub>7</sub> -N <sub>8</sub>  | -0.602                     | 0.066                              | -0.408     | -0.618                     | 0.053                              | -0.415     |
| N <sub>8</sub> -N <sub>1</sub>  | -0.575                     | 0.157                              | -0.297     | -0.585                     | 0.093                              | -0.318     |
| C <sub>3a</sub> -N <sub>8</sub> | -0.753                     | 0.134                              | -0.396     | -0.884                     | 0.187                              | -0.427     |
| C <sub>5</sub> -O <sub>5</sub>  | -0.257                     | 0.099                              | -0.688     | -0.270                     | 0.098                              | -0.687     |
|                                 | <b>4a</b>                  |                                    |            | <b>4b</b>                  |                                    |            |
| N <sub>1</sub> -C <sub>2</sub>  | 0.313                      | -0.663                             | 0.140      | 0.377                      | -1.020                             | 0.316      |
| C <sub>2</sub> -N <sub>3</sub>  | 0.369                      | -1.130                             | 0.218      | 0.304                      | -0.761                             | 0.135      |
| N <sub>3</sub> -C <sub>3a</sub> | 0.327                      | -0.983                             | 0.141      | 0.312                      | -0.881                             | 0.191      |
| C <sub>3a</sub> -N <sub>4</sub> | 0.368                      | -1.181                             | 0.194      | 0.375                      | -1.197                             | 0.205      |
| N <sub>4</sub> -C <sub>5</sub>  | 0.327                      | -0.965                             | 0.074      | 0.318                      | -0.931                             | 0.063      |
| C <sub>5</sub> -C <sub>6</sub>  | 0.315                      | -0.873                             | 0.263      | 0.322                      | -0.911                             | 0.287      |
| C <sub>6</sub> -C <sub>7</sub>  | 0.292                      | -0.788                             | 0.207      | 0.285                      | -0.753                             | 0.183      |
| C <sub>7</sub> -N <sub>8</sub>  | 0.268                      | -0.609                             | 0.046      | 0.262                      | -0.641                             | 0.054      |
| N <sub>8</sub> -N <sub>1</sub>  | 0.359                      | -0.686                             | 0.201      | 0.343                      | -0.591                             | 0.080      |
| C <sub>3a</sub> -N <sub>8</sub> | 0.303                      | -0.712                             | 0.153      | 0.319                      | -0.906                             | 0.205      |
| C <sub>7</sub> -O <sub>7</sub>  | 0.404                      | -0.376                             | 0.101      | 0.415                      | -0.264                             | 0.101      |
|                                 | <b>6a</b>                  |                                    |            | <b>6b</b>                  |                                    |            |
| N <sub>1</sub> -C <sub>2</sub>  | 0.300                      | -0.820                             | 0.087      | 0.372                      | -0.978                             | 0.319      |
| C <sub>2</sub> -N <sub>3</sub>  | 0.384                      | -1.106                             | 0.235      | 0.308                      | -0.798                             | 0.144      |
| N <sub>3</sub> -C <sub>3a</sub> | 0.310                      | -0.901                             | 0.098      | 0.304                      | -0.862                             | 0.177      |
| C <sub>3a</sub> -N <sub>4</sub> | 0.388                      | -1.189                             | 0.239      | 0.389                      | -1.217                             | 0.231      |
| N <sub>4</sub> -C <sub>5</sub>  | 0.292                      | -0.830                             | 0.048      | 0.288                      | -0.803                             | 0.055      |
| C <sub>5</sub> -C <sub>6</sub>  | 0.271                      | -0.670                             | 0.149      | 0.272                      | -0.673                             | 0.166      |
| C <sub>6</sub> -C <sub>7</sub>  | 0.327                      | -0.931                             | 0.368      | 0.323                      | -0.911                             | 0.367      |
| C <sub>7</sub> -N <sub>8</sub>  | 0.296                      | -0.747                             | 0.126      | 0.297                      | -0.758                             | 0.114      |
| N <sub>8</sub> -N <sub>1</sub>  | 0.328                      | -0.556                             | 0.142      | 0.340                      | -0.574                             | 0.094      |
| C <sub>3a</sub> -N <sub>8</sub> | 0.293                      | -0.747                             | 0.127      | 0.310                      | -0.857                             | 0.179      |
| C <sub>5</sub> -O <sub>5</sub>  | 0.408                      | -0.270                             | 0.099      | 0.407                      | -0.290                             | 0.097      |
| C <sub>7</sub> -N <sub>7</sub>  | 0.308                      | -0.933                             | 0.126      | 0.318                      | -0.974                             | 0.162      |

Table S2: Electron charge density,  $\rho(r)$ , Laplacian of the charge density,  $\nabla^2\rho(r)$ , and distance,  $\Delta r$ , from the nucleus for  $-\nabla^2\rho(r)$  in the VSCC, at the B3LYP/6-311+G\*\* level

| maxima          | $\rho(r)$<br>( $e/a_o^3$ ) | $\nabla^2\rho(r)$<br>( $e/a_o^5$ ) | $\Delta r$<br>( $\text{\AA}$ ) | $\rho(r)$<br>( $e/a_o^3$ ) | $\nabla^2\rho(r)$<br>( $e/a_o^5$ ) | $\Delta r$<br>( $\text{\AA}$ ) | $\rho(r)$<br>( $e/a_o^3$ ) | $\nabla^2\rho(r)$<br>( $e/a_o^5$ ) | $\Delta r$<br>( $\text{\AA}$ ) |
|-----------------|----------------------------|------------------------------------|--------------------------------|----------------------------|------------------------------------|--------------------------------|----------------------------|------------------------------------|--------------------------------|
|                 | <b>1</b>                   |                                    |                                | <b>2c</b>                  |                                    |                                | <b>2d</b>                  |                                    |                                |
| @N <sub>1</sub> | 0.391                      | -1.015                             | 0.467                          | 0.390                      | -0.999                             | 0.468                          | 0.396                      | -1.026                             | 0.468                          |
|                 | 0.514                      | -1.989                             | 0.431                          | 0.525                      | -2.081                             | 0.429                          | 0.578                      | -2.728                             | 0.389                          |
|                 | 0.563                      | -2.565                             | 0.392                          | 0.581                      | -2.759                             | 0.388                          | 0.519                      | -2.047                             | 0.429                          |
| @N <sub>3</sub> | 0.558                      | -2.490                             | 0.393                          | 0.566                      | -2.570                             | 0.392                          | 0.570                      | -2.613                             | 0.391                          |
|                 | 0.478                      | -1.641                             | 0.441                          | 0.483                      | -1.624                             | 0.445                          | 0.479                      | -1.671                             | 0.439                          |
|                 | 0.471                      | -1.590                             | 0.442                          | 0.473                      | -1.626                             | 0.439                          | 0.483                      | -1.657                             | 0.443                          |
| @N <sub>4</sub> | 0.561                      | -2.495                             | 0.393                          | 0.496                      | -2.076                             | 0.434                          | 0.568                      | -2.568                             | 0.392                          |
|                 | 0.474                      | -1.643                             | 0.438                          | 0.481                      | -1.564                             | 0.411                          | 0.475                      | -1.650                             | 0.442                          |
|                 | 0.473                      | -1.567                             | 0.446                          | 0.476                      | -1.662                             | 0.440                          | 0.498                      | -1.745                             | 0.440                          |
|                 |                            |                                    |                                | 0.489                      | -1.772                             | 0.430                          |                            |                                    |                                |
| @N <sub>8</sub> | 0.469                      | -1.467                             | 0.412                          | 0.474                      | -1.694                             | 0.436                          | 0.482                      | -1.764                             | 0.434                          |
|                 | 0.507                      | -1.943                             | 0.427                          | 0.505                      | -1.900                             | 0.431                          | 0.507                      | -1.970                             | 0.429                          |
|                 | 0.466                      | -1.629                             | 0.438                          | 0.499                      | -1.921                             | 0.430                          | 0.509                      | -1.984                             | 0.426                          |
|                 | 0.500                      | -1.909                             | 0.430                          | 0.469                      | -1.461                             | 0.412                          |                            |                                    |                                |
| @O <sub>5</sub> | 0.926                      | -4.784                             | 0.344                          | 0.933                      | -4.883                             | 0.343                          | 0.938                      | -4.865                             | 0.342                          |
|                 | 0.931                      | -4.832                             | 0.343                          | 0.937                      | -4.917                             | 0.342                          | 0.938                      | -4.865                             | 0.342                          |
|                 | 0.735                      | -2.457                             | 0.386                          | 0.751                      | -2.582                             | 0.386                          | 0.757                      | -3.156                             | 0.377                          |
|                 |                            |                                    |                                |                            |                                    |                                | 0.728                      | -2.591                             | 0.380                          |
|                 | <b>3</b>                   |                                    |                                | <b>4c</b>                  |                                    |                                | <b>4d</b>                  |                                    |                                |
| @N <sub>1</sub> | 0.577                      | -2.711                             | 0.389                          | 0.589                      | -2.849                             | 0.387                          | 0.399                      | -1.033                             | 0.468                          |
|                 | 0.401                      | -1.088                             | 0.464                          | 0.397                      | -1.050                             | 0.466                          | 0.514                      | -1.997                             | 0.430                          |
|                 | 0.517                      | -2.019                             | 0.431                          | 0.525                      | -2.088                             | 0.429                          | 0.568                      | -2.614                             | 0.391                          |
| @N <sub>3</sub> | 0.558                      | -2.500                             | 0.393                          | 0.564                      | -2.555                             | 0.392                          | 0.571                      | -2.635                             | 0.390                          |
|                 | 0.478                      | -1.634                             | 0.442                          | 0.485                      | -1.637                             | 0.445                          | 0.480                      | -1.646                             | 0.443                          |
|                 | 0.480                      | -1.670                             | 0.440                          | 0.476                      | -1.654                             | 0.438                          | 0.483                      | -1.691                             | 0.439                          |
| @N <sub>4</sub> | 0.562                      | -2.517                             | 0.393                          | 0.495                      | -2.061                             | 0.435                          | 0.584                      | -2.754                             | 0.389                          |
|                 | 0.470                      | -1.601                             | 0.444                          | 0.480                      | -1.535                             | 0.411                          | 0.477                      | -1.676                             | 0.442                          |
|                 | 0.482                      | -1.683                             | 0.440                          | 0.483                      | -1.727                             | 0.438                          | 0.495                      | -1.786                             | 0.437                          |
|                 |                            |                                    |                                | 0.488                      | -1.763                             | 0.434                          |                            |                                    |                                |
| @N <sub>8</sub> | 0.500                      | -1.879                             | 0.428                          | 0.496                      | -1.817                             | 0.432                          | 0.506                      | -1.942                             | 0.431                          |
|                 | 0.466                      | -1.634                             | 0.438                          | 0.499                      | -1.947                             | 0.424                          | 0.514                      | -2.010                             | 0.424                          |
|                 | 0.464                      | -1.453                             | 0.413                          | 0.467                      | -1.476                             | 0.412                          | 0.482                      | -1.749                             | 0.435                          |
|                 | 0.500                      | -1.955                             | 0.424                          | 0.473                      | -1.683                             | 0.436                          |                            |                                    |                                |
| @O <sub>7</sub> | 0.735                      | -2.430                             | 0.387                          | 0.761                      | -2.673                             | 0.385                          | 0.939                      | -4.860                             | 0.342                          |
|                 | 0.926                      | -4.770                             | 0.343                          | 0.944                      | -5.021                             | 0.342                          | 0.939                      | -4.860                             | 0.342                          |
|                 | 0.920                      | -4.684                             | 0.344                          | 0.938                      | -4.945                             | 0.342                          | 0.764                      | -3.228                             | 0.376                          |
|                 |                            |                                    |                                |                            |                                    |                                | 0.715                      | -2.450                             | 0.383                          |

Table S2: Cont.

| maxima          | $\rho(r)$<br>( $e/a_o^3$ ) | $\nabla^2\rho(r)$<br>( $e/a_o^5$ ) | $\Delta r$<br>( $\text{\AA}$ ) | $\rho(r)$<br>( $e/a_o^3$ ) | $\nabla^2\rho(r)$<br>( $e/a_o^5$ ) | $\Delta r$<br>( $\text{\AA}$ ) | $\rho(r)$<br>( $e/a_o^3$ ) | $\nabla^2\rho(r)$<br>( $e/a_o^5$ ) | $\Delta r$<br>( $\text{\AA}$ ) |
|-----------------|----------------------------|------------------------------------|--------------------------------|----------------------------|------------------------------------|--------------------------------|----------------------------|------------------------------------|--------------------------------|
|                 | <b>5</b>                   |                                    |                                | <b>6c</b>                  |                                    |                                | <b>6d</b>                  |                                    |                                |
| @N <sub>1</sub> | 0.512                      | -1.968                             | 0.431                          | 0.523                      | -2.057                             | 0.429                          | 0.571                      | -2.648                             | 0.391                          |
|                 | 0.559                      | -2.514                             | 0.393                          | 0.575                      | -2.693                             | 0.390                          | 0.394                      | -1.011                             | 0.468                          |
|                 | 0.389                      | -0.997                             | 0.467                          | 0.389                      | -0.994                             | 0.468                          | 0.518                      | -2.023                             | 0.430                          |
| @N <sub>3</sub> | 0.468                      | -1.577                             | 0.443                          | 0.474                      | -1.631                             | 0.440                          | 0.479                      | -1.668                             | 0.440                          |
|                 | 0.479                      | -1.648                             | 0.441                          | 0.480                      | -1.605                             | 0.445                          | 0.481                      | -1.641                             | 0.443                          |
|                 | 0.558                      | -2.491                             | 0.393                          | 0.565                      | -2.567                             | 0.392                          | 0.569                      | -2.605                             | 0.391                          |
| @N <sub>4</sub> | 0.471                      | -1.622                             | 0.438                          | 0.484                      | -1.583                             | 0.410                          | 0.560                      | -2.481                             | 0.393                          |
|                 | 0.558                      | -2.465                             | 0.393                          | 0.485                      | -1.596                             | 0.410                          | 0.489                      | -1.682                             | 0.442                          |
|                 | 0.475                      | -1.570                             | 0.446                          | 0.476                      | -1.645                             | 0.441                          | 0.472                      | -1.612                             | 0.444                          |
|                 |                            |                                    |                                | 0.494                      | -2.058                             | 0.434                          |                            |                                    |                                |
|                 |                            |                                    |                                | 0.487                      | -1.765                             | 0.430                          |                            |                                    |                                |
| @N <sub>8</sub> | 0.478                      | -1.531                             | 0.411                          | 0.479                      | -1.555                             | 0.410                          | 0.476                      | -1.703                             | 0.436                          |
|                 | 0.479                      | -1.564                             | 0.410                          | 0.479                      | -1.548                             | 0.410                          | 0.509                      | -1.954                             | 0.426                          |
|                 | 0.507                      | -1.926                             | 0.427                          | 0.506                      | -1.889                             | 0.431                          | 0.496                      | -1.869                             | 0.432                          |
|                 | 0.494                      | -1.849                             | 0.432                          | 0.491                      | -1.848                             | 0.432                          | 0.469                      | -1.458                             | 0.412                          |
|                 | 0.462                      | -1.590                             | 0.439                          | 0.470                      | -1.652                             | 0.437                          | 0.470                      | -1.459                             | 0.412                          |
| @O <sub>5</sub> | 0.925                      | -4.768                             | 0.344                          | 0.946                      | -5.042                             | 0.342                          | 0.756                      | -3.144                             | 0.377                          |
|                 | 0.929                      | -4.811                             | 0.343                          | 0.942                      | -5.007                             | 0.342                          | 0.938                      | -4.868                             | 0.342                          |
|                 | 0.734                      | -2.446                             | 0.386                          | 0.758                      | -2.671                             | 0.384                          | 0.938                      | -4.867                             | 0.342                          |
|                 |                            |                                    |                                |                            |                                    |                                | 0.726                      | -2.582                             | 0.380                          |
|                 | <b>6b</b>                  |                                    |                                |                            |                                    |                                |                            |                                    |                                |
| @N <sub>1</sub> | 0.401                      | -1.119                             | 0.461                          | @N <sub>4</sub> 0.562      | -2.512                             | 0.393                          | @O <sub>5</sub> 0.929      | -4.809                             | 0.343                          |
|                 | 0.594                      | -2.899                             | 0.386                          | 0.472                      | -1.641                             | 0.439                          | 0.932                      | -4.864                             | 0.343                          |
|                 | 0.525                      | -2.051                             | 0.432                          | 0.481                      | -1.603                             | 0.448                          | 0.753                      | -2.593                             | 0.386                          |
| @N <sub>3</sub> | 0.489                      | -1.760                             | 0.435                          | @N <sub>8</sub> 0.498      | -1.836                             | 0.432                          |                            |                                    |                                |
|                 | 0.495                      | -2.075                             | 0.434                          | 0.455                      | -1.552                             | 0.441                          |                            |                                    |                                |
|                 | 0.475                      | -1.490                             | 0.412                          | 0.507                      | -2.015                             | 0.421                          |                            |                                    |                                |
|                 | 0.490                      | -1.762                             | 0.433                          | 0.472                      | -1.520                             | 0.411                          |                            |                                    |                                |
