# Supplementary figures and images for: Theoretical characterization of 5-oxo, 7-oxo and 5-oxo-7-amino[1,2,4]triazolo[1,5-a]pyrimidines †
Source: Royal Society of Chemistry journal article supplement (doi:10.1039/b002527p), 2000-01-01

1

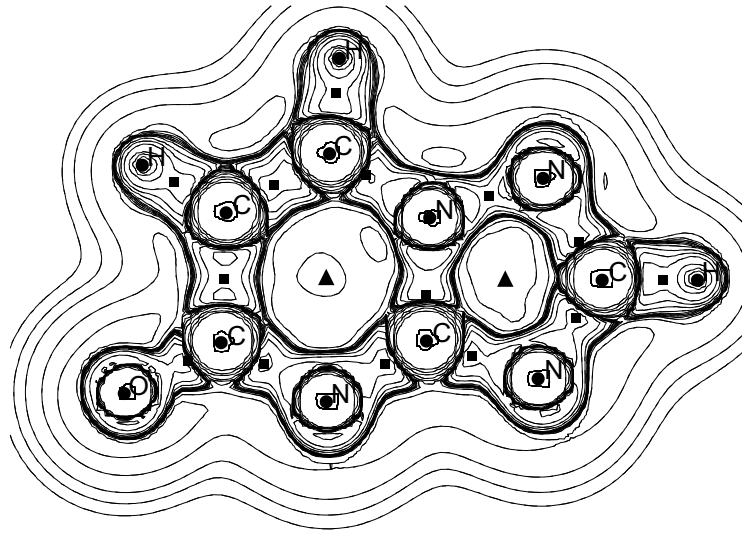

3

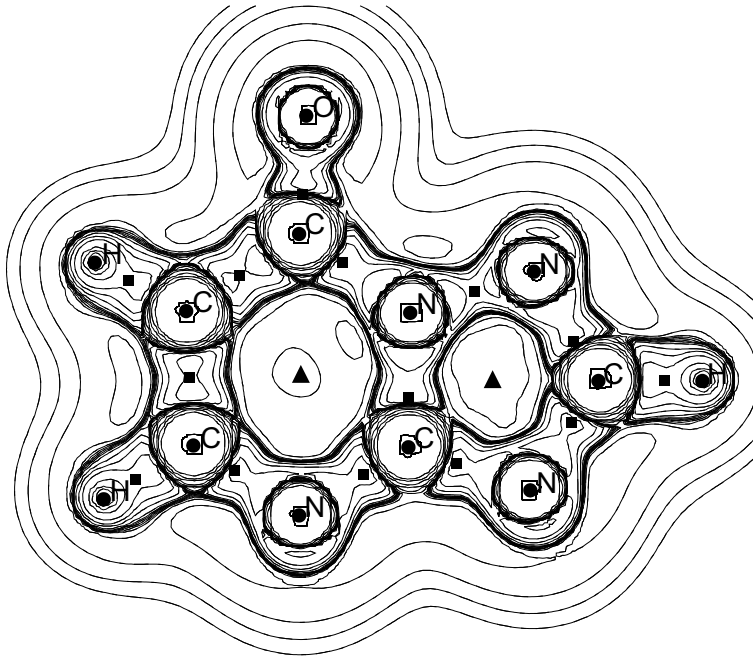

5

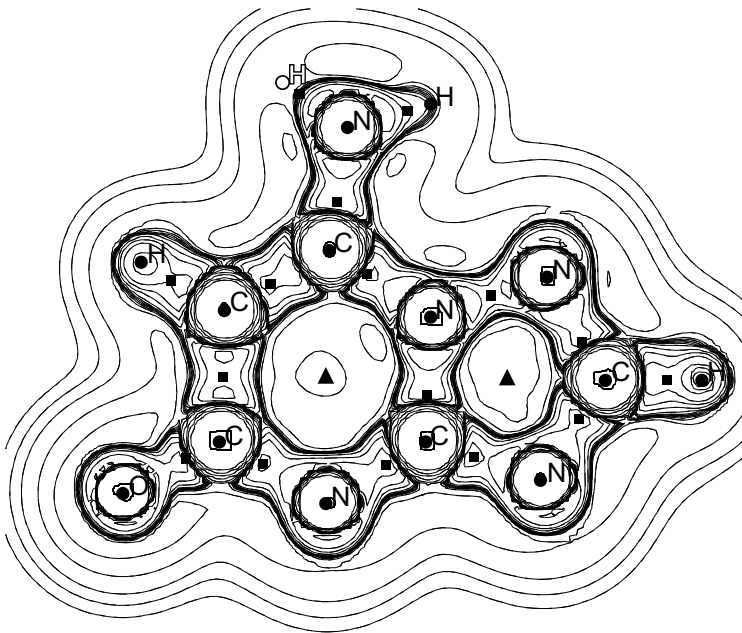

Supplement: b002527p2.pdf [file b002527p2.pdf]

2c

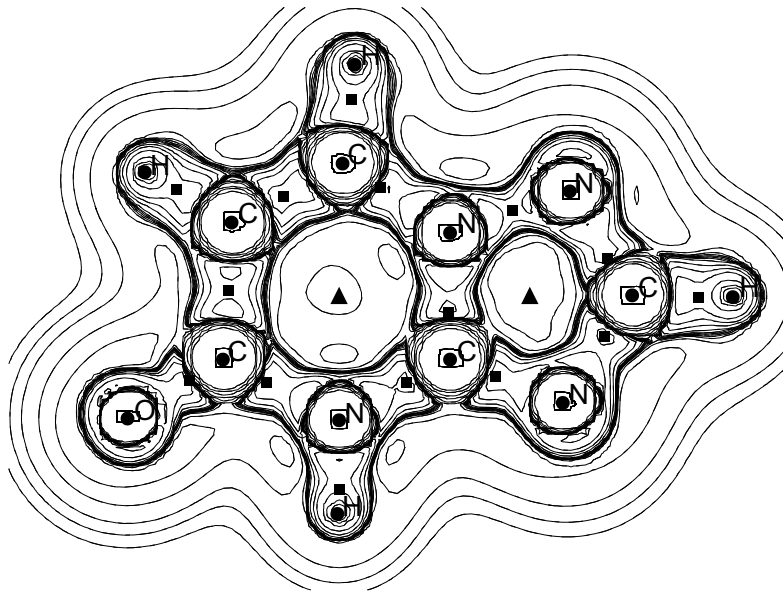

4c

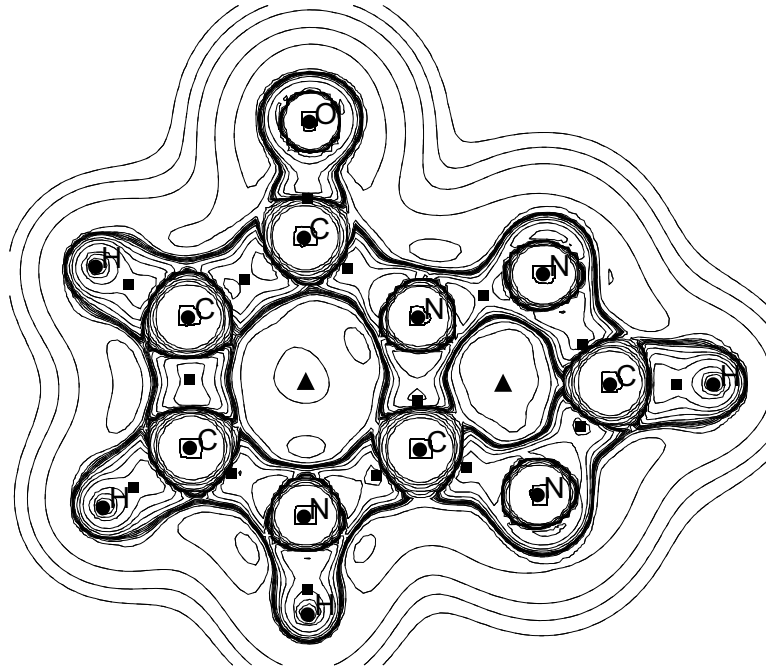

6c

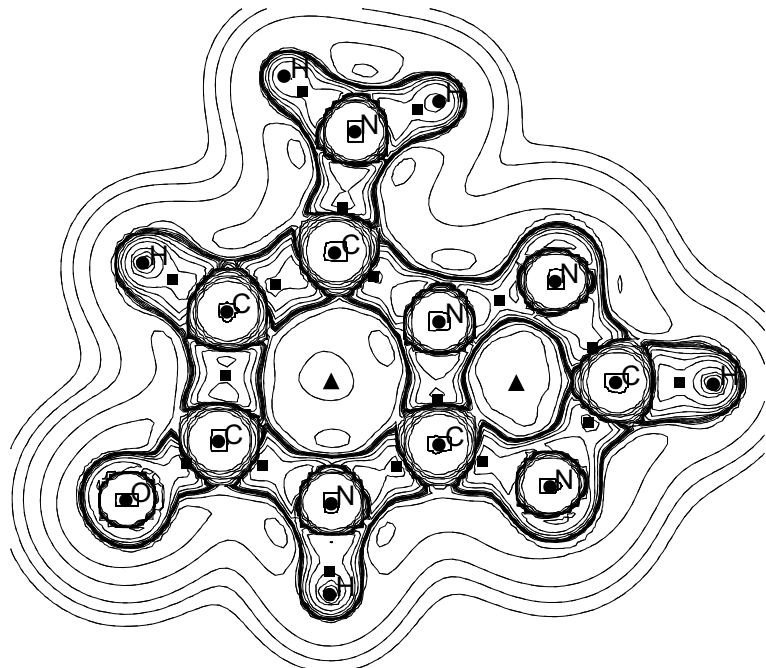

Supplement: b002527p3.pdf [file b002527p3.pdf]
